# Supplementary material for: Impact of a school-based health intervention program on body composition among South African primary schoolchildren: results from the KaziAfya cluster-randomized controlled trial
Source: Springer Nature journal article supplement (doi:10.1186/s12916-021-02223-x), 2022-01-27
Supplement: MOESM2 [file 20072816]

## Package Insert

16 Brewery Street  
ISANDO, 1600  
Tel: +27113986904 Fax: +27113925808  
www.dsmnutritionalproducts.com

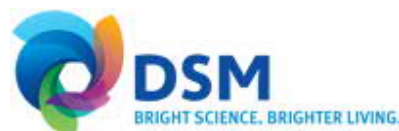

---

### Study title:

Effects of school based physical activity and multi micronutrient supplementation intervention on growth, health and well-being of schoolchildren in three African countries

Product information – Multi-Vitamin Mineral Supplement tablets for children

Batch number BN: IS2049 / IS2080

Packed: 03/2019

Expiring date: 03/2020

Chewable tablets for oral application.

The multivitamin and mineral tablets are used for clinical trials only.

The multivitamin and mineral tablets are not to be sold or administered to children other than those involved in the trial.

Trial Registration No.: ISRCTN29534081

Principal investigator, Tanzania: Marceline Finda, Ifakara,

Health Institute (IHI), Ifakara, PO Box 53, Tel: +255 232 625164, Fax: +255 232 625312, lfinda@ihi.or.tz

### Content of the chewable tablets:

| Nutrient                                      | Average per 1 Tablet <sup>1</sup> |
|-----------------------------------------------|-----------------------------------|
| β-carotene (as BetaTab 20%S)                  | 3.6 mg                            |
| Vitamin D                                     | 400 IU / 10 mcg                   |
| Vitamin E                                     | 9 mg TE                           |
| Vitamin K                                     | 30 mcg                            |
| Vitamin C                                     | 60 mg                             |
| Vitamin B1                                    | 1.1 mg                            |
| Vitamin B2                                    | 1.3 mg                            |
| Vitamin B6                                    | 0.5 mg                            |
| Vitamin B12                                   | 1.2 mcg                           |
| Folic Acid                                    | 200 mcg                           |
| Niacinamide                                   | 8 mg                              |
| Iron (added as Fe-EDTA)                       | 10 mg                             |
| Zinc (added as Zinc Oxide)                    | 5 mg                              |
| Selenium (added as Sodium Selenite Anhydrous) | 20 mcg                            |
| Iodine (added as Potassium Iodate)            | 100 mcg                           |
| Orange Flavor                                 | 12 mg                             |
| Sugar as Sucrose                              | 426.330 mg                        |
| Sorbitol                                      | Q.S.                              |

## Package Insert

16 Brewery Street  
ISANDO, 1600  
Tel: +27113986904 Fax: +27113925808  
www.dsmnutritionalproducts.com

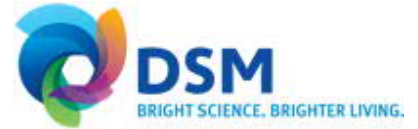

---

### Placebo:

| Specification           | Target UoM |
|-------------------------|------------|
| Riboflavin Powder as SD | 0.20 mg    |
| Cocoa Powder            | 2.40 mg    |
| Sugar as Sucrose        | 426.00 mg  |
| Sorbitol                | 320.00 mg  |
| Citric Acid Anhydrous   | 40.00 mg   |
| Orange Flavor           | 10.00 mg   |

### Stability and Storage

In its original and unopened container, this product may be stored for 12 months from the date of manufacture at a temperature of 25°C (maximum 65% RH). The "Best Before" date is indicated on the label. Keep package tightly closed. Once opened, use the contents quickly.

### Safety information

Avoid ingestion and direct contact with eyes by using suitable protective measures. For full safety information and necessary precautions, please refer to the respective Safety Data Sheet (SDS)

### Packaging information

Packed and stored in strong containers that are impervious to light and humidity. The containers must be received with an unbroken seal.
